# Supplementary material for: Ionothermal synthesis of a new open-framework zinc phosphite NIS-3 with low framework density
Source: Royal Society of Chemistry journal article supplement (doi:10.1039/b923583c), 2010-01-01
Supplement: b923583c.pdf [file b923583c.pdf]

## Supporting Information

### Ionothermal synthesis of a new open-framework zinc phosphite NIS-3 with low framework density

Jing-Dong Feng,<sup>a,b</sup> Kui-Zhan Shao,<sup>a</sup> Shu-Wei Tang,<sup>a</sup> Rong-Shun Wang<sup>\*a</sup> and Zhong-Min Su<sup>\*a</sup>

<sup>a</sup> Institute of Functional Material Chemistry, Faculty of Chemistry, Northeast Normal University, Changchun 130024, P. R. China. Fax: (+86) 431-85099511; E-mail: [wangrs@nenu.edu.cn](mailto:wangrs@nenu.edu.cn); [zmsu@nenu.edu.cn](mailto:zmsu@nenu.edu.cn)

<sup>b</sup> Institute of Applied Chemistry, College of Chemistry, Jilin Normal University, Siping 136000, P. R. China

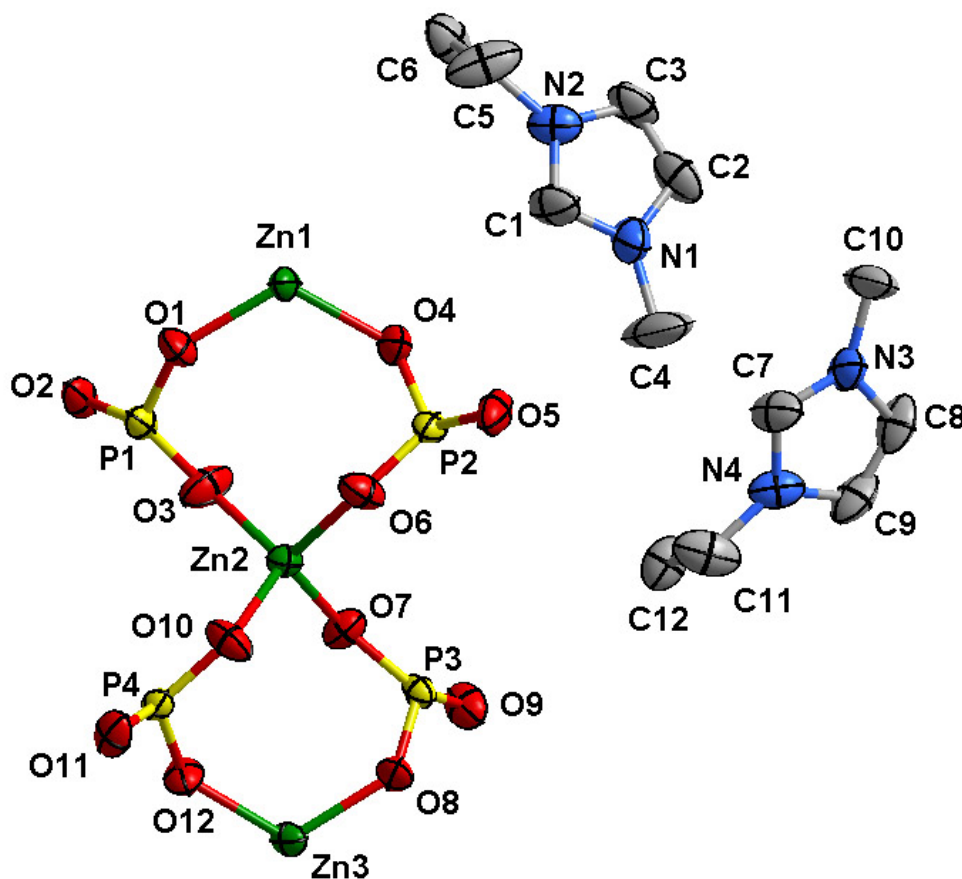

**Fig. S1** ORTEP plot of NIS-3. Thermal ellipsoids are given at 50% probability. All hydrogen atoms are omitted for clarity.

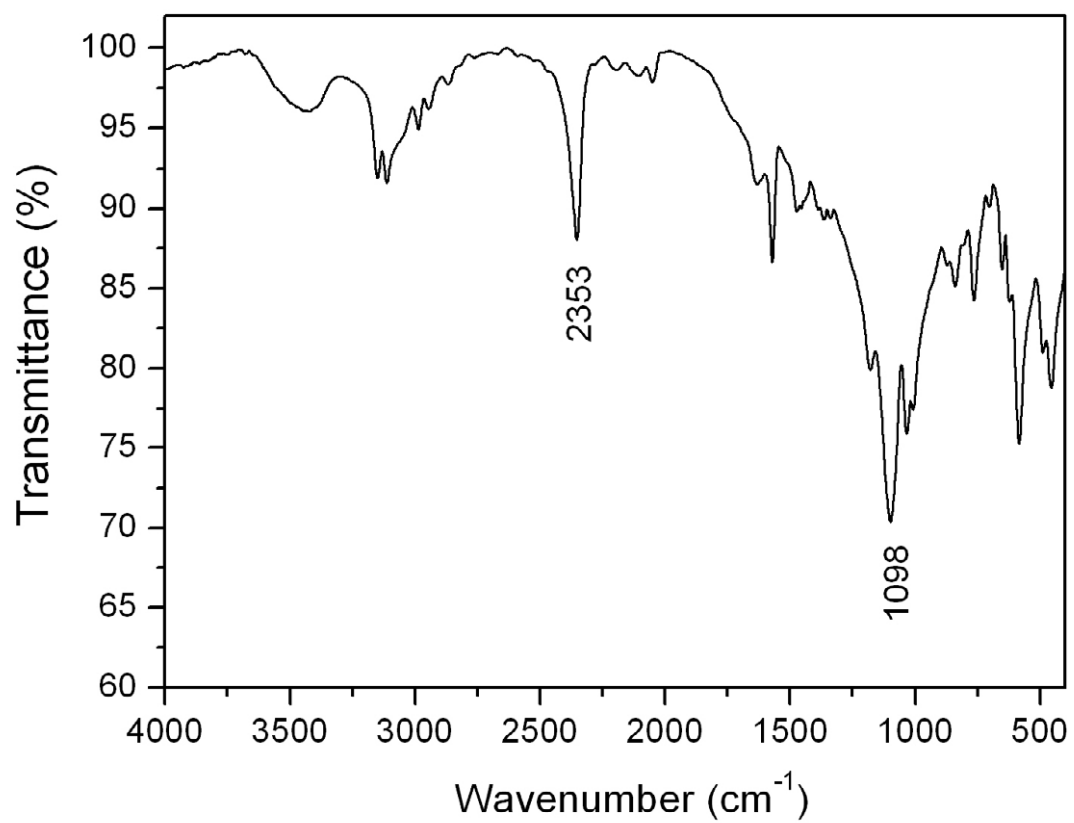

**Fig. S2** IR spectra of NIS-3.

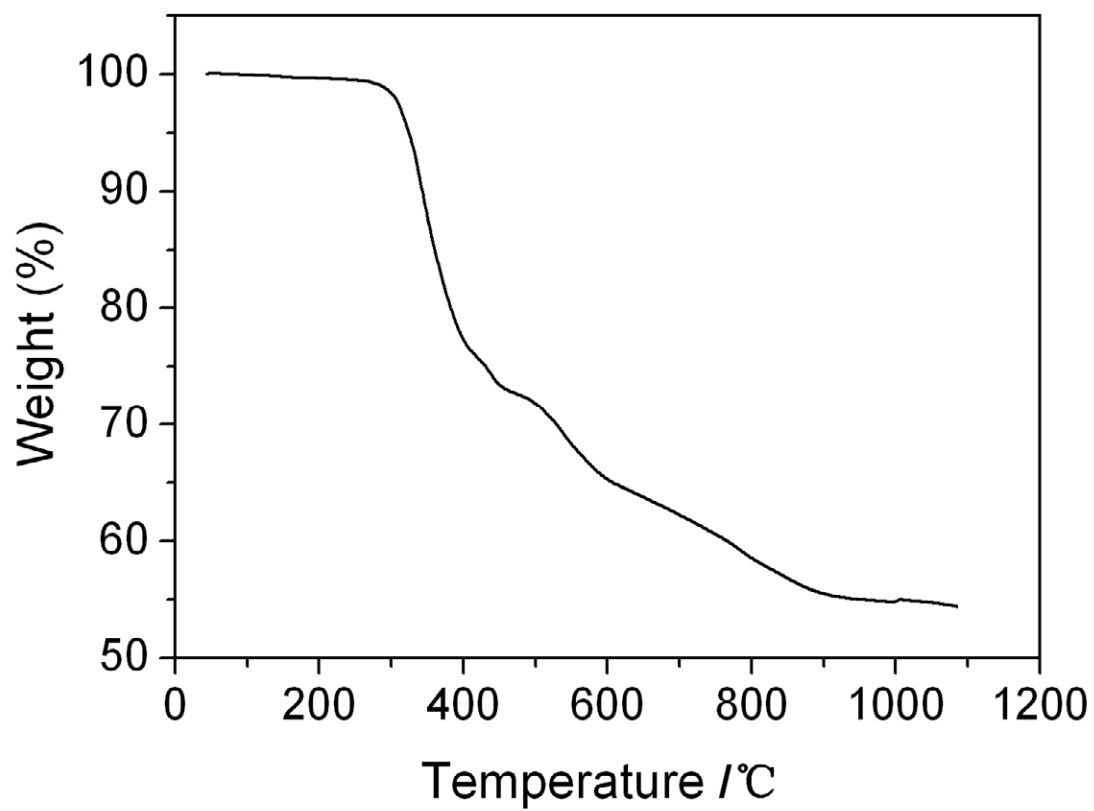

**Fig. S3** Thermogravimetric curve for NIS-3.

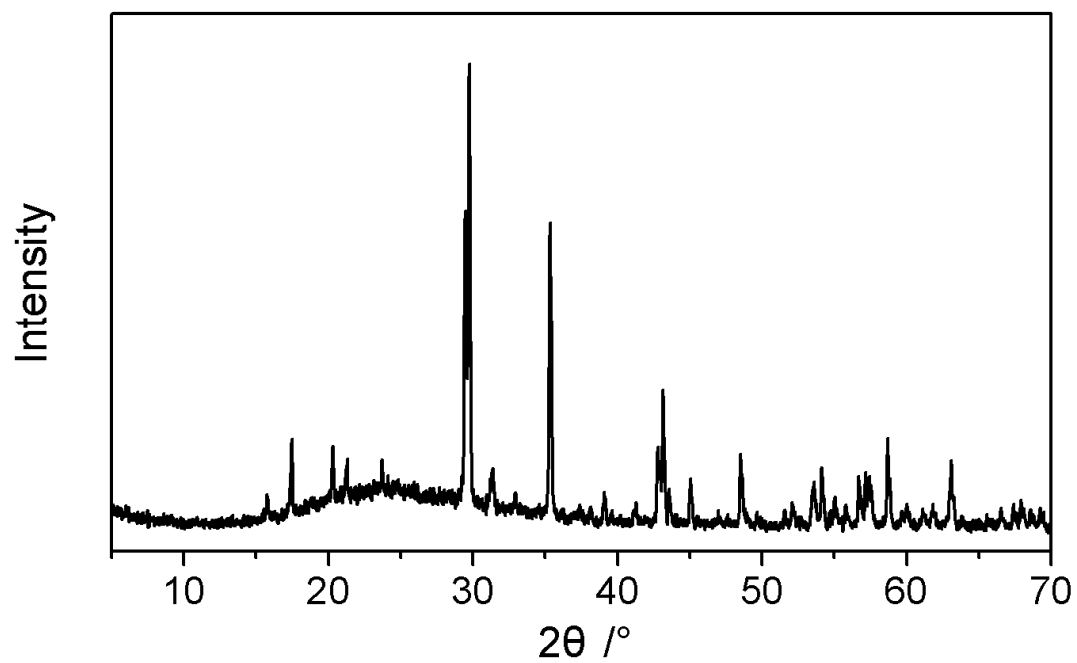

**Fig. S4** Experimental XRD pattern for the cooling residue (heating 1 hour in air).

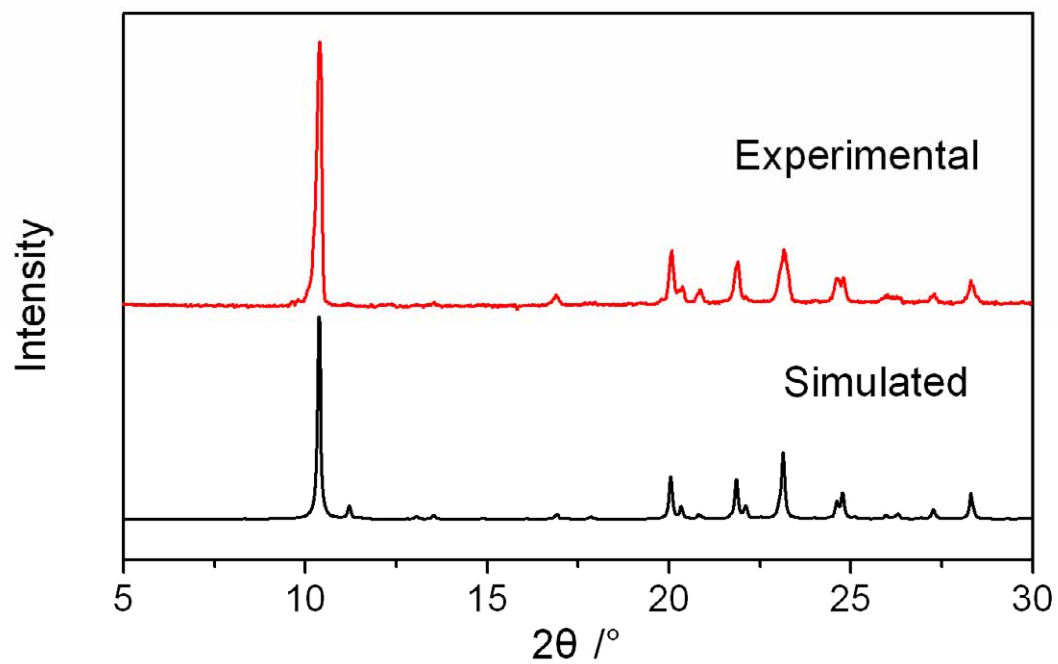

**Fig. S5** Experimental and simulated XRD patterns for NIS-3.
